# Supplementary material for: Does Transportation Mean Transplantation? Impact of New Airline Routes on Sharing of Cadaveric Kidneys
Source: Atypon-hosted journal article supplement (doi:10.1287/mnsc.2021.4103), 2021-07-09
Supplement: mnsc.2021.4103.sm1.pdf [file mnsc.2021.4103.sm1.pdf]

## Online Appendix to “Does Transportation Mean Transplantation? Impact of New Airline Routes on Sharing of Cadaveric Kidneys”

In this online appendix, we first provide descriptions of newly introduced airline routes (as discussed in §5.1 of the paper) in §OA.1. Then, in §OA.2, we provide detailed results of our robustness checks (as discussed in §5.3 of the paper). In §OA.3, we present a number of results connected to the discussions and managerial insights in §6 of the paper. Finally, in §OA.4, we discuss several additional considerations.

### OA.1. Description of Newly Introduced Airline Routes

We list in Table A1 all the pairs of airports that constitute the treatment group in our main analysis.

### OA.2. Results of Robustness Checks

We provide detailed results corresponding to our robustness checks in various subsections of §5.3, including:

- Tables B1–B2, which correspond to §5.3.1;
- Tables B3 and B4, which corresponds to §5.3.2;
- Table B5, which corresponds to §5.3.3;
- Tables B6 to B9, which corresponds to §5.3.4;
- Table B10, which corresponds to §5.3.5;
- Table B11, which corresponds to §5.3.6;
- Table B12, which corresponds to §5.3.7;
- Tables B13–B14, which correspond to §5.3.8;
- Table B15, which corresponds to §5.3.9;
- Tables B16–B17, which correspond to §5.3.10.

**Table A1 Description of Newly Introduced Airline Routes**

| Origin Airport | Origin City         | Destination Airport | Destination City   | Date of Introduction |
|----------------|---------------------|---------------------|--------------------|----------------------|
| BUR            | Burbank, CA         | DAL                 | Dallas, TX         | Jun 2016             |
| BWI            | Baltimore, MD       | SAN                 | San Diego, CA      | Jul 2003             |
| CLT            | Charlotte, NC       | DAL                 | Dallas, TX         | Aug 2015             |
| CLT            | Charlotte, NC       | HOU                 | Houston, TX        | Apr 2013             |
| CLT            | Charlotte, NC       | OMA                 | Omaha, NE          | Mar 2012             |
| CLT            | Charlotte, NC       | PWM                 | Portland, ME       | Jul 2004             |
| CLT            | Charlotte, NC       | SAT                 | San Antonio, TX    | May 2008             |
| CMH            | Columbus, OH        | DAL                 | Dallas, TX         | Apr 2015             |
| DAL            | Dallas, TX          | BUR                 | Burbank, CA        | Jun 2016             |
| DAL            | Dallas, TX          | BWI                 | Baltimore, MD      | Oct 2014             |
| DAL            | Dallas, TX          | CMH                 | Columbus, OH       | Apr 2015             |
| DAL            | Dallas, TX          | LGA                 | New York, NY       | Oct 2014             |
| DAL            | Dallas, TX          | PDX                 | Portland, OR       | Apr 2015             |
| DAL            | Dallas, TX          | PHL                 | Philadelphia, PA   | Aug 2015             |
| DAL            | Dallas, TX          | PHX                 | Phoenix, AZ        | Nov 2014             |
| DAL            | Dallas, TX          | RDU                 | Raleigh/Durham, NC | Aug 2015             |
| DAL            | Dallas, TX          | SLC                 | Salt Lake City, UT | Aug 2015             |
| DSM            | Des Moines, IA      | CLT                 | Charlotte, NC      | Apr 2012             |
| DTW            | Detroit, MI         | DAL                 | Dallas, TX         | Aug 2015             |
| DTW            | Detroit, MI         | SAT                 | San Antonio, TX    | Jul 2002             |
| EWR            | Newark, NJ          | OMA                 | Omaha, NE          | Jun 2002             |
| FLL            | Fort Lauderdale, FL | HOU                 | Houston, TX        | Sep 2005             |
| FLL            | Fort Lauderdale, FL | ORH                 | Worcester, MA      | Nov 2013             |
| HOU            | Houston, TX         | CLT                 | Charlotte, NC      | Apr 2013             |
| HOU            | Houston, TX         | IND                 | Indianapolis, IN   | Nov 2012             |
| HOU            | Houston, TX         | OMA                 | Omaha, NE          | Mar 2017             |
| HOU            | Houston, TX         | RDU                 | Raleigh/Durham, NC | May 2012             |
| HOU            | Houston, TX         | SNA                 | Santa Ana, CA      | Nov 2012             |
| IAD            | Washington, DC      | SAT                 | San Antonio, TX    | Nov 2005             |
| IAH            | Houston, TX         | RIC                 | Richmond, VA       | Nov 2002             |
| IND            | Indianapolis, IN    | HOU                 | Houston, TX        | Nov 2012             |
| JFK            | New York, NY        | AUS                 | Austin, TX         | Oct 2005             |
| JFK            | New York, NY        | PDX                 | Portland, OR       | May 2005             |
| LAS            | Las Vegas, NV       | DAL                 | Dallas, TX         | Oct 2014             |
| LGA            | New York, NY        | DAL                 | Dallas, TX         | Oct 2014             |
| LGA            | New York, NY        | MSN                 | Madison, WI        | Jan 2006             |
| MDW            | Chicago, IL         | PDX                 | Portland, OR       | Apr 2005             |
| MDW            | Chicago, IL         | SAN                 | San Diego, CA      | Jun 2002             |
| MDW            | Chicago, IL         | SAT                 | San Antonio, TX    | Oct 2005             |
| MSN            | Madison, WI         | LGA                 | New York, NY       | Jan 2006             |
| MSN            | Madison, WI         | SLC                 | Salt Lake City, UT | Jun 2013             |
| OGG            | Kahului, HI         | PHX                 | Phoenix, AZ        | Apr 2005             |
| OMA            | Omaha, NE           | CLT                 | Charlotte, NC      | Apr 2012             |
| OMA            | Omaha, NE           | HOU                 | Houston, TX        | Mar 2017             |
| OMA            | Omaha, NE           | SLC                 | Salt Lake City, UT | Oct 2002             |
| PDX            | Portland, OR        | DAL                 | Dallas, TX         | Apr 2015             |
| PHL            | Philadelphia, PA    | DAL                 | Dallas, TX         | Aug 2015             |
| PHX            | Phoenix, AZ         | DAL                 | Dallas, TX         | Nov 2014             |
| RDU            | Raleigh/Durham, NC  | DAL                 | Dallas, TX         | Aug 2015             |
| RSW            | Fort Myers, FL      | BWI                 | Baltimore, MD      | Feb 2002             |
| SAN            | San Diego, CA       | BWI                 | Baltimore, MD      | Jul 2003             |
| SAN            | San Diego, CA       | DAL                 | Dallas, TX         | Nov 2014             |
| SAT            | San Antonio, TX     | CLT                 | Charlotte, NC      | May 2008             |
| SAT            | San Antonio, TX     | MDW                 | Chicago, IL        | Oct 2005             |
| SEA            | Seattle, WA         | OMA                 | Omaha, NE          | Nov 2013             |
| SJC            | San Jose, CA        | DAL                 | Dallas, TX         | Apr 2015             |
| SLC            | Salt Lake City, UT  | DAL                 | Dallas, TX         | Aug 2015             |
| SLC            | Salt Lake City, UT  | MSN                 | Madison, WI        | Jun 2013             |
| SLC            | Salt Lake City, UT  | OMA                 | Omaha, NE          | Nov 2002             |
| SNA            | Santa Ana, CA       | HOU                 | Houston, TX        | Nov 2012             |
| TUL            | Tulsa, OK           | CLT                 | Charlotte, NC      | Jul 2014             |

**Table B1 Summary of the Dependent Variable and Features of Candidates and Donors after Matching**

| Variable                 | Never Treated |           | Ever Treated |           | T-Test |           |
|--------------------------|---------------|-----------|--------------|-----------|--------|-----------|
|                          | Mean          | Std. Dev. | Mean         | Std. Dev. | t      | $p >  t $ |
| Dependent Variable       |               |           |              |           |        |           |
| SharedVolume             | 0.13          | 0.38      | 0.20         | 0.37      | -0.90  | 0.37      |
| Candidate Features       |               |           |              |           |        |           |
| CandiAge                 | 45            | 2         | 45           | 2         | -0.57  | 0.57      |
| CandiHeight              | 169           | 2         | 169          | 1         | 0.17   | 0.86      |
| CandiWeight              | 76            | 2         | 76           | 2         | -0.18  | 0.86      |
| CandiMale                | 0.42          | 0.04      | 0.42         | 0.02      | 0.37   | 0.71      |
| CandiRaceWhite           | 0.56          | 0.22      | 0.55         | 0.19      | 0.24   | 0.81      |
| CandiRaceBlack           | 0.21          | 0.18      | 0.22         | 0.14      | -0.33  | 0.74      |
| CandiRaceHispanic        | 0.17          | 0.17      | 0.18         | 0.17      | -0.19  | 0.85      |
| CandiBloodTypeA          | 0.33          | 0.04      | 0.33         | 0.03      | -0.35  | 0.73      |
| CandiBloodTypeB          | 0.13          | 0.03      | 0.13         | 0.02      | 0.32   | 0.75      |
| CandiBloodTypeO          | 0.51          | 0.06      | 0.50         | 0.04      | 0.31   | 0.76      |
| CandiDiabetesYes         | 0.39          | 0.11      | 0.40         | 0.08      | -0.22  | 0.82      |
| CandiDiabetesUnknown     | 0.01          | 0.02      | 0.01         | 0.02      | -0.35  | 0.73      |
| CandiDialysisYes         | 0.58          | 0.10      | 0.60         | 0.07      | -1.69  | 0.09      |
| CandiDialysisYear        | 1.13          | 0.41      | 1.17         | 0.27      | -0.60  | 0.55      |
| Donor Features           |               |           |              |           |        |           |
| DonorAge                 | 37            | 6         | 37           | 6         | -0.06  | 0.96      |
| DonorHeight              | 166           | 5         | 166          | 5         | -0.18  | 0.86      |
| DonorWeight              | 72            | 6         | 72           | 5         | -0.64  | 0.53      |
| DonorCreatine            | 1.24          | 0.28      | 1.26         | 0.25      | -0.47  | 0.64      |
| DonorGenderMale          | 0.41          | 0.11      | 0.40         | 0.07      | 0.85   | 0.40      |
| DonorRaceWhite           | 0.65          | 0.21      | 0.63         | 0.22      | 0.58   | 0.57      |
| DonorRaceBlack           | 0.15          | 0.15      | 0.16         | 0.13      | -0.30  | 0.77      |
| DonorRaceHispanic        | 0.13          | 0.18      | 0.16         | 0.13      | -0.90  | 0.37      |
| DonorBloodTypeA          | 0.39          | 0.12      | 0.37         | 0.08      | 1.04   | 0.30      |
| DonorBloodTypeB          | 0.12          | 0.07      | 0.12         | 0.03      | -0.48  | 0.63      |
| DonorBloodTypeO          | 0.47          | 0.09      | 0.49         | 0.07      | -1.04  | 0.30      |
| DonorDiabetesYes         | 0.05          | 0.07      | 0.06         | 0.04      | -0.41  | 0.68      |
| DonorDiabetesUnknown     | 0.00          | 0.01      | 0.00         | 0.01      | -1.30  | 0.20      |
| DonorHypertensionYes     | 0.23          | 0.15      | 0.23         | 0.12      | 0.01   | 0.99      |
| DonorHypertensionUnknown | 0.01          | 0.01      | 0.01         | 0.01      | -0.71  | 0.48      |
| DonorHeptitisCYes        | 0.03          | 0.02      | 0.03         | 0.02      | -0.73  | 0.47      |
| DonorHeptitisCUnknown    | 0.00          | 0.00      | 0.00         | 0.00      | -0.63  | 0.53      |
| DonorCodAnoxia           | 0.14          | 0.14      | 0.11         | 0.05      | 1.48   | 0.14      |
| DonorCodCVS              | 0.44          | 0.20      | 0.42         | 0.16      | 0.54   | 0.59      |
| DonorCodTrauma           | 0.40          | 0.16      | 0.43         | 0.14      | -1.22  | 0.23      |
| DonorECDYes              | 0.21          | 0.13      | 0.21         | 0.13      | 0.25   | 0.81      |
| Number of Matched Pairs  | 51            |           | 51           |           |        |           |

Note: This table summarizes the average outcome and features of the control and treatment groups.

**Table B2 Results from the Difference-in-Differences Model (Based on Matched Samples)**

|                            | (1)      |           | (2)      |           | (3)      |           | (4)      |           |
|----------------------------|----------|-----------|----------|-----------|----------|-----------|----------|-----------|
|                            | Coeff.   | Std. err. |
| Direct Flight              | 0.055*   | 0.029     | 0.055*   | 0.030     | 0.062**  | 0.029     | 0.063**  | 0.030     |
| Candidate Features         |          |           | Included |           |          |           | Included |           |
| Donor Features             |          |           |          |           | Included |           | Included |           |
| Airport-Pair Fixed Effects | Included |           | Included |           | Included |           | Included |           |
| Year Fixed Effects         | Included |           | Included |           | Included |           | Included |           |
| Number of Observations     | 1,632    |           | 1,632    |           | 1,632    |           | 1,632    |           |
| Adjusted R-Squared         | 0.021    |           | 0.019    |           | 0.018    |           | 0.016    |           |

Note: \*\*\* p < 0.01, \*\* p < 0.05, \* p < 0.1. Robust standard errors clustered by airport pair.

**Table B3 Results Based on Airport Pairs with Existing Direct Flights as a Control Group**

|                            | (1)      |           | (2)      |           | (3)      |           | (4)      |           |
|----------------------------|----------|-----------|----------|-----------|----------|-----------|----------|-----------|
|                            | Coeff.   | Std. err. |
| Direct Flight              | 0.056*   | 0.032     | 0.057*   | 0.032     | 0.056*   | 0.032     | 0.058*   | 0.031     |
| Candidate Features         |          |           | Included |           |          |           | Included |           |
| Donor Features             |          |           |          |           | Included |           | Included |           |
| Airport-Pair Fixed Effects | Included |           | Included |           | Included |           | Included |           |
| Year Fixed Effects         | Included |           | Included |           | Included |           | Included |           |
| Number of Observations     | 3,360    |           | 3,360    |           | 3,360    |           | 3,360    |           |
| Adjusted R-Squared         | 0.173    |           | 0.175    |           | 0.174    |           | 0.176    |           |

Note: \*\*\* p < 0.01, \*\* p < 0.05, \* p < 0.1. Robust standard errors clustered by airport pair.

**Table B4 Results Based on Airport Pairs with Existing or No Direct Flights as a Control Group**

|                            | (1)      |           | (2)      |           | (3)      |           | (4)      |           |
|----------------------------|----------|-----------|----------|-----------|----------|-----------|----------|-----------|
|                            | Coeff.   | Std. err. |
| Direct Flight              | 0.073**  | 0.030     | 0.074**  | 0.030     | 0.071**  | 0.030     | 0.073**  | 0.030     |
| Candidate Features         |          |           | Included |           |          |           | Included |           |
| Donor Features             |          |           |          |           | Included |           | Included |           |
| Airport-Pair Fixed Effects | Included |           | Included |           | Included |           | Included |           |
| Year Fixed Effects         | Included |           | Included |           | Included |           | Included |           |
| Number of Observations     | 11,568   |           | 11,568   |           | 11,568   |           | 11,568   |           |
| Pseudo R-Squared           | 0.105    |           | 0.107    |           | 0.105    |           | 0.107    |           |

Note: \*\*\* p < 0.01, \*\* p < 0.05, \* p < 0.1. Robust standard errors clustered by airport pair.

**Table B5 Results from the Difference-in-Differences Model (Individual-Level Analysis)**

|                            | (1)      |           | (2)      |           | (3)      |           | (4)      |           |
|----------------------------|----------|-----------|----------|-----------|----------|-----------|----------|-----------|
|                            | Coeff.   | Std. err. |
| Direct Flight              | 0.182*** | 0.034     | 0.181*** | 0.034     | 0.302*** | 0.036     | 0.309*** | 0.036     |
| Candidate Features         |          |           | Included |           |          |           | Included |           |
| Donor Features             |          |           |          |           | Included |           | Included |           |
| Decline History            | Included |           | Included |           | Included |           | Included |           |
| Airport-Pair Fixed Effects | Included |           | Included |           | Included |           | Included |           |
| Year Fixed Effects         | Included |           | Included |           | Included |           | Included |           |
| Number of Observations     | 409,200  |           | 409,200  |           | 409,200  |           | 409,200  |           |
| Pseudo R-Squared           | 0.464    |           | 0.464    |           | 0.475    |           | 0.477    |           |

Note: \*\*\* p < 0.01, \*\* p < 0.05, \* p < 0.1. The table summarizes the results from individual-level analyses, where the dependent variable is a dummy indicating whether a candidate accepts an offer from a donor.

**Table B6 Results from the Difference-in-Differences Model (Control for Delay)**

|                            | (1)      |           | (2)      |           | (3)      |           | (4)      |           |
|----------------------------|----------|-----------|----------|-----------|----------|-----------|----------|-----------|
|                            | Coeff.   | Std. err. |
| Direct Flight              | 0.075 ** | 0.030     | 0.076 ** | 0.030     | 0.073 ** | 0.030     | 0.076 ** | 0.030     |
| Candidate Features         |          |           | Included |           |          |           | Included |           |
| Donor Features             |          |           |          |           | Included |           | Included |           |
| Flight Delay               | Included |           | Included |           | Included |           | Included |           |
| Airport-Pair Fixed Effects | Included |           | Included |           | Included |           | Included |           |
| Year Fixed Effects         | Included |           | Included |           | Included |           | Included |           |
| Number of Observations     | 9,014    |           | 9,014    |           | 9,014    |           | 9,014    |           |
| Adjusted R-Squared         | 0.062    |           | 0.063    |           | 0.062    |           | 0.063    |           |

Note: \*\*\* p < 0.01, \*\* p < 0.05, \* p < 0.1. Robust standard errors clustered by airport pair.

**Table B7 Results from the Difference-in-Differences Model (Control for Weather)**

|                            | (1)      |           | (2)      |           | (3)      |           | (4)      |           |
|----------------------------|----------|-----------|----------|-----------|----------|-----------|----------|-----------|
|                            | Coeff.   | Std. err. |
| Direct Flight              | 0.074 ** | 0.031     | 0.074 ** | 0.031     | 0.073 ** | 0.031     | 0.075 ** | 0.031     |
| Candidate Features         |          |           | Included |           |          |           | Included |           |
| Donor Features             |          |           |          |           | Included |           | Included |           |
| Weather                    | Included |           | Included |           | Included |           | Included |           |
| Airport-Pair Fixed Effects | Included |           | Included |           | Included |           | Included |           |
| Year Fixed Effects         | Included |           | Included |           | Included |           | Included |           |
| Number of Observations     | 9,030    |           | 9,030    |           | 9,030    |           | 9,030    |           |
| Adjusted R-Squared         | 0.049    |           | 0.051    |           | 0.049    |           | 0.050    |           |

Note: \*\*\* p < 0.01, \*\* p < 0.05, \* p < 0.1. Robust standard errors clustered by airport pair.

**Table B8 Results from the Difference-in-Differences Model (Control for Day and Hour)**

|                            | (1)      |           | (2)      |           | (3)      |           | (4)      |           |
|----------------------------|----------|-----------|----------|-----------|----------|-----------|----------|-----------|
|                            | Coeff.   | Std. err. |
| Direct Flight              | 0.056*   | 0.030     | 0.058 ** | 0.030     | 0.056*   | 0.030     | 0.058 ** | 0.030     |
| Candidate Features         |          |           | Included |           |          |           | Included |           |
| Donor Features             |          |           |          |           | Included |           | Included |           |
| Day and Hour               | Included |           | Included |           | Included |           | Included |           |
| Airport-Pair Fixed Effects | Included |           | Included |           | Included |           | Included |           |
| Year Fixed Effects         | Included |           | Included |           | Included |           | Included |           |
| Number of Observations     | 9,056    |           | 9,056    |           | 9,056    |           | 9,056    |           |
| Adjusted R-Squared         | 0.070    |           | 0.071    |           | 0.071    |           | 0.070    |           |

Note: \*\*\* p < 0.01, \*\* p < 0.05, \* p < 0.1. Robust standard errors clustered by airport pair.

**Table B9 Results from the Difference-in-Differences Model (Control for Delay, Weather, Day and Hour)**

|                            | (1)      |           | (2)      |           | (3)      |           | (4)      |           |
|----------------------------|----------|-----------|----------|-----------|----------|-----------|----------|-----------|
|                            | Coeff.   | Std. err. |
| Direct Flight              | 0.057*   | 0.030     | 0.060 ** | 0.030     | 0.057*   | 0.030     | 0.059 ** | 0.030     |
| Candidate Features         |          |           | Included |           |          |           | Included |           |
| Donor Features             |          |           |          |           | Included |           | Included |           |
| Weather                    | Included |           | Included |           | Included |           | Included |           |
| Flight Delay               | Included |           | Included |           | Included |           | Included |           |
| Day and Hour               | Included |           | Included |           | Included |           | Included |           |
| Airport-Pair Fixed Effects | Included |           | Included |           | Included |           | Included |           |
| Year Fixed Effects         | Included |           | Included |           | Included |           | Included |           |
| Number of Observations     | 8,893    |           | 8,893    |           | 8,893    |           | 8,893    |           |
| Adjusted R-Squared         | 0.055    |           | 0.057    |           | 0.055    |           | 0.056    |           |

Note: \*\*\* p < 0.01, \*\* p < 0.05, \* p < 0.1. Robust standard errors clustered by airport pair.

**Table B10 Results from the Difference-in-Differences Model (Based on Balanced Panel Data)**

|                            | (1)      |           | (2)      |           | (3)      |           | (4)      |           |
|----------------------------|----------|-----------|----------|-----------|----------|-----------|----------|-----------|
|                            | Coeff.   | Std. err. |
| Direct Flight              | 0.086 ** | 0.038     | 0.088 ** | 0.038     | 0.085 ** | 0.038     | 0.088 ** | 0.038     |
| Candidate Features         |          |           | Included |           |          |           | Included |           |
| Donor Features             |          |           |          |           | Included |           | Included |           |
| Airport-Pair Fixed Effects | Included |           | Included |           | Included |           | Included |           |
| Year Fixed Effects         | Included |           | Included |           | Included |           | Included |           |
| Number of Observations     | 8,752    |           | 8,752    |           | 8,752    |           | 8,752    |           |
| Adjusted R-Squared         | 0.060    |           | 0.060    |           | 0.060    |           | 0.061    |           |

Note: \*\*\* p < 0.01, \*\* p < 0.05, \* p < 0.1. Robust standard errors clustered by airport pair.

**Table B11 Results from the Difference-in-Differences Model (Based on Balanced Airport Pairs)**

|                            | (1)      |           | (2)      |           | (3)      |           | (4)      |           |
|----------------------------|----------|-----------|----------|-----------|----------|-----------|----------|-----------|
|                            | Coeff.   | Std. err. |
| Direct Flight              | 0.060 ** | 0.026     | 0.061 ** | 0.026     | 0.058 ** | 0.026     | 0.059 ** | 0.026     |
| Candidate Features         |          |           | Included |           |          |           | Included |           |
| Donor Features             |          |           |          |           | Included |           | Included |           |
| Airport-Pair Fixed Effects | Included |           | Included |           | Included |           | Included |           |
| Year Fixed Effects         | Included |           | Included |           | Included |           | Included |           |
| Number of Observations     | 10,816   |           | 10,816   |           | 10,816   |           | 10,816   |           |
| Adjusted R-Squared         | 0.117    |           | 0.117    |           | 0.117    |           | 0.117    |           |

Note: \*\*\* p < 0.01, \*\* p < 0.05, \* p < 0.1. Robust standard errors clustered by airport pair.

**Table B12 Results from the Difference-in-Differences Model (Alternative Nearby Airports)**

|                            | (1)      |           | (2)      |           | (3)      |           | (4)      |           |
|----------------------------|----------|-----------|----------|-----------|----------|-----------|----------|-----------|
|                            | Coeff.   | Std. err. |
| Direct Flight              | 0.090 ** | 0.036     | 0.089 ** | 0.036     | 0.092 ** | 0.036     | 0.091 ** | 0.036     |
| Candidate Features         |          |           | Included |           |          |           | Included |           |
| Donor Features             |          |           |          |           | Included |           | Included |           |
| Airport-Pair Fixed Effects | Included |           | Included |           | Included |           | Included |           |
| Year Fixed Effects         | Included |           | Included |           | Included |           | Included |           |
| Number of Observations     | 6,800    |           | 6,800    |           | 6,800    |           | 6,800    |           |
| Adjusted R-Squared         | 0.092    |           | 0.093    |           | 0.093    |           | 0.094    |           |

Note: \*\*\* p < 0.01, \*\* p < 0.05, \* p < 0.1. Robust standard errors clustered by airport pair.

**Table B13 Results from the Difference-in-Differences Model (Leave One Pair Out)**

| Leave-Out<br>Airport Pair | (1)       |           | (2)       |           | (3)       |           | (4)       |           |
|---------------------------|-----------|-----------|-----------|-----------|-----------|-----------|-----------|-----------|
|                           | Coeff.    | Std. err. |
| 1                         | 0.075 **  | 0.031     | 0.076 **  | 0.031     | 0.074 **  | 0.031     | 0.077 **  | 0.030     |
| 2                         | 0.074 **  | 0.031     | 0.074 **  | 0.030     | 0.073 **  | 0.030     | 0.075 **  | 0.030     |
| 3                         | 0.078 **  | 0.031     | 0.078 **  | 0.030     | 0.077 **  | 0.030     | 0.079 *** | 0.030     |
| 4                         | 0.077 **  | 0.031     | 0.078 **  | 0.031     | 0.076 **  | 0.031     | 0.079 **  | 0.031     |
| 5                         | 0.072 **  | 0.031     | 0.072 **  | 0.031     | 0.071 **  | 0.031     | 0.073 **  | 0.031     |
| 6                         | 0.072 **  | 0.031     | 0.073 **  | 0.031     | 0.072 **  | 0.031     | 0.073 **  | 0.030     |
| 7                         | 0.072 **  | 0.031     | 0.073 **  | 0.031     | 0.071 **  | 0.031     | 0.074 **  | 0.031     |
| 8                         | 0.077 **  | 0.031     | 0.077 **  | 0.031     | 0.076 **  | 0.031     | 0.078 **  | 0.030     |
| 9                         | 0.076 **  | 0.031     | 0.077 **  | 0.030     | 0.075 **  | 0.031     | 0.077 **  | 0.030     |
| 10                        | 0.053 **  | 0.022     | 0.054 **  | 0.022     | 0.052 **  | 0.022     | 0.055 **  | 0.022     |
| 11                        | 0.076 **  | 0.031     | 0.076 **  | 0.031     | 0.075 **  | 0.031     | 0.077 **  | 0.031     |
| 12                        | 0.075 **  | 0.031     | 0.077 **  | 0.031     | 0.074 **  | 0.031     | 0.078 **  | 0.031     |
| 13                        | 0.076 **  | 0.031     | 0.076 **  | 0.031     | 0.075 **  | 0.031     | 0.077 **  | 0.031     |
| 14                        | 0.068 **  | 0.030     | 0.069 **  | 0.030     | 0.067 **  | 0.030     | 0.070 **  | 0.030     |
| 15                        | 0.076 **  | 0.031     | 0.076 **  | 0.031     | 0.075 **  | 0.031     | 0.077 **  | 0.031     |
| 16                        | 0.071 **  | 0.031     | 0.072 **  | 0.031     | 0.070 **  | 0.031     | 0.072 **  | 0.030     |
| 17                        | 0.075 **  | 0.031     | 0.076 **  | 0.031     | 0.074 **  | 0.031     | 0.077 **  | 0.031     |
| 18                        | 0.077 **  | 0.031     | 0.077 **  | 0.031     | 0.076 **  | 0.031     | 0.078 **  | 0.031     |
| 19                        | 0.071 **  | 0.031     | 0.072 **  | 0.031     | 0.070 **  | 0.031     | 0.073 **  | 0.030     |
| 20                        | 0.074 **  | 0.030     | 0.074 **  | 0.030     | 0.073 **  | 0.030     | 0.075 **  | 0.030     |
| 21                        | 0.074 **  | 0.030     | 0.074 **  | 0.030     | 0.073 **  | 0.030     | 0.075 **  | 0.030     |
| 22                        | 0.074 **  | 0.031     | 0.075 **  | 0.031     | 0.073 **  | 0.031     | 0.076 **  | 0.031     |
| 23                        | 0.072 **  | 0.031     | 0.073 **  | 0.031     | 0.071 **  | 0.031     | 0.073 **  | 0.031     |
| 24                        | 0.075 **  | 0.031     | 0.075 **  | 0.031     | 0.074 **  | 0.031     | 0.076 **  | 0.031     |
| 25                        | 0.077 **  | 0.031     | 0.078 **  | 0.031     | 0.076 **  | 0.031     | 0.078 **  | 0.031     |
| 26                        | 0.077 **  | 0.030     | 0.077 **  | 0.030     | 0.076 **  | 0.030     | 0.078 *** | 0.030     |
| 27                        | 0.070 **  | 0.031     | 0.070 **  | 0.031     | 0.069 **  | 0.031     | 0.071 **  | 0.031     |
| 28                        | 0.067 **  | 0.030     | 0.068 **  | 0.030     | 0.066 **  | 0.030     | 0.068 **  | 0.030     |
| 29                        | 0.073 **  | 0.031     | 0.074 **  | 0.031     | 0.072 **  | 0.031     | 0.075 **  | 0.031     |
| 30                        | 0.074 **  | 0.030     | 0.075 **  | 0.030     | 0.073 **  | 0.030     | 0.076 **  | 0.030     |
| 31                        | 0.074 **  | 0.031     | 0.075 **  | 0.031     | 0.074 **  | 0.031     | 0.076 **  | 0.031     |
| 32                        | 0.074 **  | 0.031     | 0.074 **  | 0.031     | 0.073 **  | 0.031     | 0.075 **  | 0.031     |
| 33                        | 0.074 **  | 0.031     | 0.074 **  | 0.031     | 0.073 **  | 0.031     | 0.075 **  | 0.031     |
| 34                        | 0.073 **  | 0.031     | 0.073 **  | 0.031     | 0.072 **  | 0.031     | 0.074 **  | 0.031     |
| 35                        | 0.078 **  | 0.031     | 0.078 **  | 0.031     | 0.077 **  | 0.031     | 0.079 *** | 0.030     |
| 36                        | 0.071 **  | 0.031     | 0.071 **  | 0.031     | 0.070 **  | 0.031     | 0.072 **  | 0.031     |
| 37                        | 0.079 *** | 0.030     | 0.079 *** | 0.030     | 0.078 **  | 0.030     | 0.080 *** | 0.030     |
| 38                        | 0.074 **  | 0.030     | 0.074 **  | 0.030     | 0.073 **  | 0.030     | 0.075 **  | 0.030     |
| 39                        | 0.074 **  | 0.031     | 0.074 **  | 0.031     | 0.073 **  | 0.031     | 0.075 **  | 0.031     |
| 40                        | 0.074 **  | 0.031     | 0.075 **  | 0.031     | 0.073 **  | 0.031     | 0.075 **  | 0.031     |
| 41                        | 0.077 **  | 0.031     | 0.078 **  | 0.031     | 0.076 **  | 0.031     | 0.078 **  | 0.031     |
| 42                        | 0.074 **  | 0.031     | 0.074 **  | 0.031     | 0.073 **  | 0.031     | 0.075 **  | 0.031     |
| 43                        | 0.072 **  | 0.031     | 0.073 **  | 0.031     | 0.071 **  | 0.031     | 0.073 **  | 0.031     |
| 44                        | 0.076 **  | 0.030     | 0.076 **  | 0.030     | 0.075 **  | 0.030     | 0.077 **  | 0.030     |
| 45                        | 0.073 **  | 0.030     | 0.074 **  | 0.030     | 0.072 **  | 0.030     | 0.075 **  | 0.030     |
| 46                        | 0.074 **  | 0.031     | 0.074 **  | 0.031     | 0.073 **  | 0.031     | 0.075 **  | 0.031     |
| 47                        | 0.070 **  | 0.031     | 0.071 **  | 0.031     | 0.069 **  | 0.031     | 0.072 **  | 0.030     |
| 48                        | 0.074 **  | 0.031     | 0.075 **  | 0.031     | 0.073 **  | 0.031     | 0.076 **  | 0.031     |
| 49                        | 0.072 **  | 0.031     | 0.073 **  | 0.031     | 0.071 **  | 0.031     | 0.074 **  | 0.031     |
| 50                        | 0.074 **  | 0.030     | 0.075 **  | 0.030     | 0.073 **  | 0.030     | 0.075 **  | 0.030     |
| 51                        | 0.073 **  | 0.031     | 0.073 **  | 0.030     | 0.072 **  | 0.030     | 0.074 **  | 0.030     |
| 52                        | 0.072 **  | 0.031     | 0.072 **  | 0.031     | 0.071 **  | 0.031     | 0.073 **  | 0.031     |
| 53                        | 0.081 *** | 0.030     | 0.082 *** | 0.030     | 0.080 *** | 0.030     | 0.082 *** | 0.030     |
| 54                        | 0.073 **  | 0.031     | 0.073 **  | 0.031     | 0.072 **  | 0.031     | 0.074 **  | 0.031     |
| 55                        | 0.077 **  | 0.031     | 0.077 **  | 0.031     | 0.076 **  | 0.031     | 0.078 **  | 0.031     |
| 56                        | 0.077 **  | 0.031     | 0.077 **  | 0.031     | 0.076 **  | 0.031     | 0.078 **  | 0.030     |
| 57                        | 0.076 **  | 0.031     | 0.077 **  | 0.031     | 0.075 **  | 0.031     | 0.077 **  | 0.030     |
| 58                        | 0.067 **  | 0.030     | 0.068 **  | 0.030     | 0.066 **  | 0.030     | 0.068 **  | 0.030     |
| 59                        | 0.074 **  | 0.030     | 0.075 **  | 0.030     | 0.073 **  | 0.030     | 0.075 **  | 0.030     |
| 60                        | 0.076 **  | 0.031     | 0.077 **  | 0.031     | 0.075 **  | 0.031     | 0.078 **  | 0.031     |
| 61                        | 0.078 **  | 0.031     | 0.078 **  | 0.031     | 0.077 **  | 0.031     | 0.078 **  | 0.031     |

Note: \*\*\* p < 0.01, \*\* p < 0.05, \* p < 0.1. Robust standard errors clustered by airport pair.

**Table B14 Results from the Difference-in-Differences Model (Leave One Airport Out)**

| Leave-Out<br>Airport | (1)       |           | (2)       |           | (3)       |           | (4)       |           |
|----------------------|-----------|-----------|-----------|-----------|-----------|-----------|-----------|-----------|
|                      | Coeff.    | Std. err. |
| Origin Airport       |           |           |           |           |           |           |           |           |
| 1                    | 0.075 **  | 0.031     | 0.076 **  | 0.031     | 0.074 **  | 0.031     | 0.077 **  | 0.030     |
| 2                    | 0.074 **  | 0.031     | 0.074 **  | 0.030     | 0.073 **  | 0.030     | 0.075 **  | 0.030     |
| 3                    | 0.076 **  | 0.033     | 0.076 **  | 0.033     | 0.076 **  | 0.033     | 0.078 **  | 0.033     |
| 4                    | 0.077 **  | 0.031     | 0.077 **  | 0.031     | 0.076 **  | 0.031     | 0.078 **  | 0.030     |
| 5                    | 0.053 **  | 0.024     | 0.055 **  | 0.024     | 0.053 **  | 0.024     | 0.057 **  | 0.024     |
| 6                    | 0.077 **  | 0.031     | 0.077 **  | 0.031     | 0.076 **  | 0.031     | 0.078 **  | 0.031     |
| 7                    | 0.071 **  | 0.031     | 0.072 **  | 0.031     | 0.070 **  | 0.031     | 0.073 **  | 0.030     |
| 8                    | 0.074 **  | 0.030     | 0.074 **  | 0.030     | 0.073 **  | 0.030     | 0.075 **  | 0.030     |
| 9                    | 0.072 **  | 0.032     | 0.073 **  | 0.031     | 0.071 **  | 0.031     | 0.074 **  | 0.031     |
| 10                   | 0.070 **  | 0.032     | 0.071 **  | 0.032     | 0.069 **  | 0.032     | 0.071 **  | 0.032     |
| 11                   | 0.073 **  | 0.031     | 0.074 **  | 0.031     | 0.072 **  | 0.031     | 0.075 **  | 0.031     |
| 12                   | 0.074 **  | 0.030     | 0.075 **  | 0.030     | 0.073 **  | 0.030     | 0.076 **  | 0.030     |
| 13                   | 0.074 **  | 0.031     | 0.075 **  | 0.031     | 0.074 **  | 0.031     | 0.076 **  | 0.031     |
| 14                   | 0.074 **  | 0.031     | 0.074 **  | 0.031     | 0.073 **  | 0.031     | 0.075 **  | 0.031     |
| 15                   | 0.073 **  | 0.031     | 0.073 **  | 0.031     | 0.072 **  | 0.031     | 0.074 **  | 0.031     |
| 16                   | 0.075 **  | 0.031     | 0.075 **  | 0.031     | 0.074 **  | 0.031     | 0.076 **  | 0.031     |
| 17                   | 0.079 **  | 0.031     | 0.080 *** | 0.031     | 0.078 **  | 0.031     | 0.080 *** | 0.031     |
| 18                   | 0.077 **  | 0.031     | 0.078 **  | 0.031     | 0.076 **  | 0.031     | 0.079 **  | 0.031     |
| 19                   | 0.074 **  | 0.031     | 0.074 **  | 0.031     | 0.073 **  | 0.031     | 0.075 **  | 0.031     |
| 20                   | 0.074 **  | 0.031     | 0.074 **  | 0.031     | 0.073 **  | 0.031     | 0.075 **  | 0.031     |
| 21                   | 0.074 **  | 0.031     | 0.074 **  | 0.031     | 0.073 **  | 0.031     | 0.075 **  | 0.031     |
| 22                   | 0.070 **  | 0.031     | 0.071 **  | 0.031     | 0.069 **  | 0.031     | 0.072 **  | 0.030     |
| 23                   | 0.074 **  | 0.031     | 0.075 **  | 0.031     | 0.073 **  | 0.031     | 0.076 **  | 0.031     |
| 24                   | 0.072 **  | 0.031     | 0.073 **  | 0.031     | 0.071 **  | 0.031     | 0.074 **  | 0.031     |
| 25                   | 0.074 **  | 0.030     | 0.075 **  | 0.030     | 0.073 **  | 0.030     | 0.075 **  | 0.030     |
| 26                   | 0.071 **  | 0.031     | 0.071 **  | 0.031     | 0.069 **  | 0.031     | 0.072 **  | 0.031     |
| 27                   | 0.080 *** | 0.031     | 0.081 *** | 0.030     | 0.080 *** | 0.031     | 0.081 *** | 0.030     |
| 28                   | 0.077 **  | 0.031     | 0.077 **  | 0.031     | 0.076 **  | 0.031     | 0.078 **  | 0.031     |
| 29                   | 0.077 **  | 0.031     | 0.077 **  | 0.031     | 0.076 **  | 0.031     | 0.078 **  | 0.030     |
| 30                   | 0.070 **  | 0.031     | 0.070 **  | 0.031     | 0.069 **  | 0.031     | 0.071 **  | 0.030     |
| 31                   | 0.076 **  | 0.031     | 0.077 **  | 0.031     | 0.075 **  | 0.031     | 0.078 **  | 0.031     |
| 32                   | 0.078 **  | 0.031     | 0.078 **  | 0.031     | 0.077 **  | 0.031     | 0.078 **  | 0.031     |
| Destination Airport  |           |           |           |           |           |           |           |           |
| 1                    | 0.074 **  | 0.031     | 0.074 **  | 0.031     | 0.073 **  | 0.031     | 0.075 **  | 0.031     |
| 2                    | 0.076 **  | 0.031     | 0.077 **  | 0.030     | 0.075 **  | 0.031     | 0.077 **  | 0.030     |
| 3                    | 0.052 **  | 0.022     | 0.053 **  | 0.022     | 0.051 **  | 0.022     | 0.053 **  | 0.022     |
| 4                    | 0.090 *** | 0.033     | 0.089 *** | 0.033     | 0.089 *** | 0.032     | 0.089 *** | 0.032     |
| 5                    | 0.076 **  | 0.031     | 0.076 **  | 0.031     | 0.075 **  | 0.031     | 0.077 **  | 0.031     |
| 6                    | 0.084 **  | 0.037     | 0.086 **  | 0.037     | 0.082 **  | 0.037     | 0.087 **  | 0.037     |
| 7                    | 0.083 **  | 0.033     | 0.084 **  | 0.033     | 0.082 **  | 0.033     | 0.085 *** | 0.033     |
| 8                    | 0.077 **  | 0.031     | 0.078 **  | 0.031     | 0.076 **  | 0.031     | 0.078 **  | 0.031     |
| 9                    | 0.075 **  | 0.032     | 0.077 **  | 0.031     | 0.074 **  | 0.031     | 0.078 **  | 0.031     |
| 10                   | 0.073 **  | 0.031     | 0.073 **  | 0.031     | 0.072 **  | 0.031     | 0.074 **  | 0.031     |
| 11                   | 0.064 **  | 0.031     | 0.065 **  | 0.031     | 0.063 **  | 0.031     | 0.065 **  | 0.030     |
| 12                   | 0.079 **  | 0.032     | 0.078 **  | 0.032     | 0.078 **  | 0.032     | 0.079 **  | 0.031     |
| 13                   | 0.072 **  | 0.031     | 0.073 **  | 0.031     | 0.071 **  | 0.031     | 0.073 **  | 0.031     |
| 14                   | 0.081 *** | 0.031     | 0.082 *** | 0.031     | 0.081 **  | 0.031     | 0.083 *** | 0.031     |
| 15                   | 0.068 **  | 0.030     | 0.069 **  | 0.030     | 0.067 **  | 0.030     | 0.070 **  | 0.030     |
| 16                   | 0.076 **  | 0.031     | 0.076 **  | 0.031     | 0.075 **  | 0.031     | 0.077 **  | 0.031     |
| 17                   | 0.072 **  | 0.031     | 0.073 **  | 0.031     | 0.072 **  | 0.031     | 0.073 **  | 0.030     |
| 18                   | 0.067 **  | 0.031     | 0.067 **  | 0.031     | 0.066 **  | 0.031     | 0.068 **  | 0.031     |
| 19                   | 0.074 **  | 0.030     | 0.075 **  | 0.030     | 0.073 **  | 0.030     | 0.076 **  | 0.030     |
| 20                   | 0.074 **  | 0.031     | 0.075 **  | 0.030     | 0.073 **  | 0.030     | 0.075 **  | 0.030     |
| 21                   | 0.072 **  | 0.032     | 0.073 **  | 0.032     | 0.071 **  | 0.032     | 0.073 **  | 0.032     |
| 22                   | 0.078 **  | 0.031     | 0.079 **  | 0.031     | 0.077 **  | 0.031     | 0.080 **  | 0.031     |
| 23                   | 0.067 **  | 0.030     | 0.068 **  | 0.030     | 0.066 **  | 0.030     | 0.068 **  | 0.030     |

Note: \*\*\* p < 0.01, \*\* p < 0.05, \* p < 0.1. Robust standard errors clustered by airport pair.

**Table B15 Results from the Difference-in-Differences Probit Model**

|                            | (1)       |           | (2)       |           | (3)       |           | (4)       |           |
|----------------------------|-----------|-----------|-----------|-----------|-----------|-----------|-----------|-----------|
|                            | Coeff.    | Std. err. |
| Direct Flight              | 0.368 *** | 0.121     | 0.382 *** | 0.120     | 0.363 *** | 0.123     | 0.379 *** | 0.123     |
| Candidate Features         |           |           | Included  |           |           |           | Included  |           |
| Donor Features             |           |           |           |           | Included  |           | Included  |           |
| Airport-Pair Fixed Effects | Included  |           | Included  |           | Included  |           | Included  |           |
| Year Fixed Effects         | Included  |           | Included  |           | Included  |           | Included  |           |
| Number of Observations     | 9,184     |           | 9,184     |           | 9,184     |           | 9,184     |           |
| Pseudo R-Squared           | 0.097     |           | 0.098     |           | 0.101     |           | 0.105     |           |

Note: \*\*\* p < 0.01, \*\* p < 0.05, \* p < 0.1. Robust standard errors clustered by airport pair.

**Table B16 Estimation Results Based on a Cut-Off Distance of 900 Miles**

|                            | (1)      |           | (2)      |           | (3)      |           | (4)      |           |
|----------------------------|----------|-----------|----------|-----------|----------|-----------|----------|-----------|
|                            | Coeff.   | Std. err. |
| Direct Flight              | 0.119 ** | 0.047     | 0.117 ** | 0.047     | 0.118 ** | 0.047     | 0.117 ** | 0.46      |
| Candidate Features         |          |           | Included |           |          |           | Included |           |
| Donor Features             |          |           |          |           | Included |           | Included |           |
| Airport-Pair Fixed Effects | Included |           | Included |           | Included |           | Included |           |
| Year Fixed Effects         | Included |           | Included |           | Included |           | Included |           |
| Number of Observations     | 6,048    |           | 6,048    |           | 6,048    |           | 6,048    |           |
| Adjusted R-Squared         | 0.088    |           | 0.090    |           | 0.087    |           | 0.087    |           |

Note: \*\*\* p < 0.01, \*\* p < 0.05, \* p < 0.1. Robust standard errors clustered by airport pair.

**Table B17 Results Based on a Cut-Off Frequency of 10 Flights/Month**

|                            | (1)      |           | (2)      |           | (3)      |           | (4)      |           |
|----------------------------|----------|-----------|----------|-----------|----------|-----------|----------|-----------|
|                            | Coeff.   | Std. err. |
| Direct Flight              | 0.071 ** | 0.029     | 0.071 ** | 0.029     | 0.070 ** | 0.029     | 0.071 ** | 0.029     |
| Candidate Features         |          |           | Included |           |          |           | Included |           |
| Donor Features             |          |           |          |           | Included |           | Included |           |
| Airport-Pair Fixed Effects | Included |           | Included |           | Included |           | Included |           |
| Year Fixed Effects         | Included |           | Included |           | Included |           | Included |           |
| Number of Observations     | 9,088    |           | 9,088    |           | 9,088    |           | 9,088    |           |
| Adjusted R-Squared         | 0.062    |           | 0.064    |           | 0.062    |           | 0.063    |           |

Note: \*\*\* p < 0.01, \*\* p < 0.05, \* p < 0.1. Robust standard errors clustered by airport pair.

### OA.3. Additional Results for Discussions and Managerial Insights

We present several results as mentioned in §6 (“Discussions and Managerial Insights”). First, in relation to §6.1, we present the impact of new airline routes on local transplant volume in Table C1. Next, in relation to §6.2, we provide our results in Tables C2 and C3 about the effect of new airline routes on airport pairs with existing direct-flight routes. Then, in relation to §6.3, we provide an alternative measure of post-transplant survival and present our results in Table C4. Finally, in relation to §6.4, we present the effect of the timing of the new airline routes in Tables C5 and C6.

**Table C1 Results from the Difference-in-Differences Model (Local Volume)**

|                            | (1)      |           | (2)      |           | (3)      |           | (4)      |           |
|----------------------------|----------|-----------|----------|-----------|----------|-----------|----------|-----------|
|                            | Coeff.   | Std. err. |
| Direct Flight              | 0.031    | 0.023     | 0.031    | 0.023     | 0.027    | 0.023     | 0.028    | 0.0232    |
| Candidate Features         |          |           | Included |           |          |           | Included |           |
| Donor Features             |          |           |          |           | Included |           | Included |           |
| Airport-Pair Fixed Effects | Included |           | Included |           | Included |           | Included |           |
| Year Fixed Effects         | Included |           | Included |           | Included |           | Included |           |
| Number of Observations     | 9,184    |           | 9,184    |           | 9,184    |           | 9,184    |           |
| Adjusted R-Squared         | 0.926    |           | 0.927    |           | 0.927    |           | 0.929    |           |

Note: \*\*\*  $p < 0.01$ , \*\*  $p < 0.05$ , \*  $p < 0.1$ . Robust standard errors clustered by airport pair.

**Table C2 Effect of New Airline Routes on Existing Direct Flights (with the Same Origin)**

|                            | (1)      |           | (2)      |           | (3)      |           | (4)      |           |
|----------------------------|----------|-----------|----------|-----------|----------|-----------|----------|-----------|
|                            | Coeff.   | Std. err. |
| Direct Flight              | -0.032   | 0.028     | -0.038   | 0.027     | -0.034   | 0.028     | -0.039   | 0.027     |
| Candidate Features         |          |           | Included |           |          |           | Included |           |
| Donor Features             |          |           |          |           | Included |           | Included |           |
| Airport-Pair Fixed Effects | Included |           | Included |           | Included |           | Included |           |
| Year Fixed Effects         | Included |           | Included |           | Included |           | Included |           |
| Number of Observations     | 2,064    |           | 2,064    |           | 2,064    |           | 2,064    |           |
| Adjusted R-Squared         | 0.197    |           | 0.203    |           | 0.196    |           | 0.202    |           |

Note: \*\*\*  $p < 0.01$ , \*\*  $p < 0.05$ , \*  $p < 0.1$ . Robust standard errors clustered by airport pair.

**Table C3 Effect of New Airline Routes on Existing Direct Flights (with the Same Destination)**

|                            | (1)      |           | (2)      |           | (3)      |           | (4)      |           |
|----------------------------|----------|-----------|----------|-----------|----------|-----------|----------|-----------|
|                            | Coeff.   | Std. err. |
| Direct Flight              | -0.043   | 0.028     | -0.042   | 0.029     | -0.045   | 0.028     | -0.044   | 0.029     |
| Candidate Features         |          |           | Included |           |          |           | Included |           |
| Donor Features             |          |           |          |           | Included |           | Included |           |
| Airport-Pair Fixed Effects | Included |           | Included |           | Included |           | Included |           |
| Year Fixed Effects         | Included |           | Included |           | Included |           | Included |           |
| Number of Observations     | 2,144    |           | 2,144    |           | 2,144    |           | 2,144    |           |
| Adjusted R-Squared         | 0.186    |           | 0.194    |           | 0.187    |           | 0.194    |           |

Note: \*\*\*  $p < 0.01$ , \*\*  $p < 0.05$ , \*  $p < 0.1$ . Robust standard errors clustered by airport pair.

**Table C4 Effect of New Airline Routes on 5-Year Post-Transplant Survival**

|                            | (1)      |           | (2)      |           | (3)      |           | (4)      |           |
|----------------------------|----------|-----------|----------|-----------|----------|-----------|----------|-----------|
|                            | Coeff.   | Std. err. |
| Direct Flight              | 0.002    | 0.007     | 0.003    | 0.007     | 0.005    | 0.008     | 0.005    | 0.007     |
| Candidate Features         |          |           | Included |           |          |           | Included |           |
| Donor Features             |          |           |          |           | Included |           | Included |           |
| Airport-Pair Fixed Effects | Included |           | Included |           | Included |           | Included |           |
| Year Fixed Effects         | Included |           | Included |           | Included |           | Included |           |
| Number of Observations     | 4,114    |           | 4,114    |           | 4,114    |           | 4,114    |           |
| Adjusted R-Squared         | 0.388    |           | 0.397    |           | 0.402    |           | 0.411    |           |

Note: \*\*\*  $p < 0.01$ , \*\*  $p < 0.05$ , \*  $p < 0.1$ . Robust standard errors clustered by airport pair.

**Table C5 Results from the Difference-in-Differences Model (Day vs. Evening)**

|                            | (1)      |           | (2)      |           | (3)      |           | (4)      |           |
|----------------------------|----------|-----------|----------|-----------|----------|-----------|----------|-----------|
|                            | Coeff.   | Std. err. |
| Direct Flight (Day)        | 0.086 ** | 0.039     | 0.086 ** | 0.039     | 0.085 ** | 0.039     | 0.086 ** | 0.039     |
| Direct Flight (Evening)    | 0.056*   | 0.034     | 0.057*   | 0.034     | 0.055*   | 0.034     | 0.059*   | 0.034     |
| Candidate Features         |          |           | Included |           |          |           | Included |           |
| Donor Features             |          |           |          |           | Included |           | Included |           |
| Airport-Pair Fixed Effects | Included |           | Included |           | Included |           | Included |           |
| Year Fixed Effects         | Included |           | Included |           | Included |           | Included |           |
| Number of Observations     | 9,184    |           | 9,184    |           | 9,184    |           | 9,184    |           |
| Adjusted R-Squared         | 0.062    |           | 0.063    |           | 0.061    |           | 0.063    |           |

Note: \*\*\*  $p < 0.01$ , \*\*  $p < 0.05$ , \*  $p < 0.1$ . The treatment pairs are divided into two groups based the median value of the percentage of evening flights. Robust standard errors clustered by airport pair.

**Table C6 Results from the Difference-in-Differences Model (Weekday vs. Weekend)**

|                            | (1)      |           | (2)      |           | (3)      |           | (4)      |           |
|----------------------------|----------|-----------|----------|-----------|----------|-----------|----------|-----------|
|                            | Coeff.   | Std. err. |
| Direct Flight (Weekday)    | 0.084 ** | 0.043     | 0.085 ** | 0.043     | 0.083 ** | 0.043     | 0.086 ** | 0.042     |
| Direct Flight (Weekend)    | 0.065 ** | 0.029     | 0.065 ** | 0.029     | 0.064 ** | 0.029     | 0.065*   | 0.029     |
| Candidate Features         |          |           | Included |           |          |           | Included |           |
| Donor Features             |          |           |          |           | Included |           | Included |           |
| Airport-Pair Fixed Effects | Included |           | Included |           | Included |           | Included |           |
| Year Fixed Effects         | Included |           | Included |           | Included |           | Included |           |
| Number of Observations     | 9,184    |           | 9,184    |           | 9,184    |           | 9,184    |           |
| Adjusted R-Squared         | 0.062    |           | 0.063    |           | 0.061    |           | 0.063    |           |

Note: \*\*\*  $p < 0.01$ , \*\*  $p < 0.05$ , \*  $p < 0.1$ . The treatment pairs are divided into two groups based the median value of the percentage of weekend flights. Robust standard errors clustered by airport pair.

## OA.4. Additional Considerations

We present results related to two additional considerations.

### OA.4.1. Interaction with Kidneys from Expanded Criteria Donors

One may wonder whether the introduction of new airline routes has a heterogeneous effect on cross-regional sharing of kidneys from expanded criteria donors (ECDs). To address this question, we include an interaction term  $DirectFlight_{ijt} * ECDYes_{ijt}$  in our econometric model, where  $ECDYes_{ijt}$  is a dummy variable that is equal to 1 if there exist ECDs who are served by airport  $i$  in year  $t$ , and 0 otherwise. Specifically, we estimate the following regression model:

$$\ln(SharedVolume_{ijt}) = \alpha_0 + \alpha_1 DirectFlight_{ijt} + \alpha_2 DirectFlight_{ijt} * ECDYes_{ijt} + \alpha_3 Feature_{ijt} + \alpha_4 Airports_{ij} + \alpha_5 Year_t + \varepsilon_{ijt}.$$

Our results in [Table D1](#) show the coefficient  $\alpha_1$  is positive and statistically significant, confirming that introducing direct flights facilitates kidney sharing. In addition, the coefficient  $\alpha_2$  is not statistically significant, suggesting no significant heterogeneous effect exists on cross-regional sharing of kidneys from ECDs.

**Table D1 Results from the Difference-in-Differences Model (Interaction with ECD)**

|                            | (1)      |           | (2)      |           | (3)      |           | (4)      |           |
|----------------------------|----------|-----------|----------|-----------|----------|-----------|----------|-----------|
|                            | Coeff.   | Std. err. |
| Direct Flight<br>× ECDYes  | 0.067*   | 0.037     | 0.069*   | 0.036     | 0.062*   | 0.037     | 0.064*   | 0.036     |
|                            | 0.018    | 0.032     | 0.019    | 0.032     | 0.028    | 0.031     | 0.029    | 0.031     |
| Candidate Features         |          |           | Included |           |          |           | Included |           |
| Donor Features             |          |           |          |           | Included |           | Included |           |
| Airport-Pair Fixed Effects | Included |           | Included |           | Included |           | Included |           |
| Year Fixed Effects         | Included |           | Included |           | Included |           | Included |           |
| Number of Observations     | 9,184    |           | 9,184    |           | 9,184    |           | 9,184    |           |
| Adjusted R-Squared         | 0.062    |           | 0.063    |           | 0.061    |           | 0.063    |           |

Note: \*\*\*  $p < 0.01$ , \*\*  $p < 0.05$ , \*  $p < 0.1$ . Robust standard errors clustered by airport pair.

### OA.4.2. Interaction with the 2014 Policy

Since December 4, 2014, a new policy, known as the Kidney Allocation System (KAS), has been implemented. Although KAS seeks to improve post-transplant survival outcomes (among other objectives), it does not address the effect of airline-transportation networks. Thus, its interaction with the effect of new airline routes remains unclear. Following your suggestion, we have performed a new analysis by adding an interaction term  $DirectFlight_{ijt} * After2014_{ijt}$ , where  $After2014_{ijt}$  is a dummy variable, which is equal to 1 if direct flights between airport  $i$  and  $j$  are introduced

in year  $t$  that is either in or after 2014, and 0 otherwise. Specifically, we estimate the following regression model:

$$\ln(\text{SharedVolume}_{ijt}) = \alpha_0 + \alpha_1 \text{DirectFlight}_{ijt} + \alpha_2 \text{DirectFlight}_{ijt} * \text{After2014} + \alpha_3 \text{Feature}_{ijt} + \alpha_4 \text{Airports}_{ij} + \alpha_5 \text{Year}_t + \varepsilon_{ijt}.$$

Our results in [Table D2](#) show the coefficient  $\alpha_1$  is positive and statistically significant, confirming that introducing direct flights facilitates kidney sharing. In addition, the coefficient  $\alpha_2$  is not statistically significant, suggesting the new policy has not significantly changed the effect of introducing new airline routes. This insignificant result may be partly due to the fact that the years after 2014 include three years — namely, 2015, 2016, and 2017 — which may not be long enough for the effect of this new policy to show up in the data. We leave continued investigations of the interaction between the policy-specific effect and the direct-flight effect characterized in our paper to future research. In sum, we did not find a significant policy-specific effect, in part because the policy was introduced in December 2014, whereas our study period lasts until 2017. The interaction of the 2014 policy with the effect of new airline routes warrants further investigation.

**Table D2 Results from the Difference-in-Differences Model (Interaction with the 2014 Policy)**

|                            | (1)      |           | (2)       |           | (3)      |           | (4)       |           |
|----------------------------|----------|-----------|-----------|-----------|----------|-----------|-----------|-----------|
|                            | Coeff.   | Std. err. | Coeff.    | Std. err. | Coeff.   | Std. err. | Coeff.    | Std. err. |
| Direct Flight              | 0.073 ** | 0.029     | 0.078 *** | 0.029     | 0.071 ** | 0.029     | 0.077 *** | 0.029     |
| × After 2014               | 0.003    | 0.066     | −0.005    | 0.067     | −0.004   | 0.066     | −0.004    | 0.067     |
| Candidate Features         |          |           | Included  |           |          |           | Included  |           |
| Donor Features             |          |           |           |           | Included |           | Included  |           |
| Airport-Pair Fixed Effects | Included |           | Included  |           | Included |           | Included  |           |
| Year Fixed Effects         | Included |           | Included  |           | Included |           | Included  |           |
| Number of Observations     | 9,184    |           | 9,184     |           | 9,184    |           | 9,184     |           |
| Adjusted R-Squared         | 0.062    |           | 0.063     |           | 0.061    |           | 0.062     |           |

Note: \*\*\*  $p < 0.01$ , \*\*  $p < 0.05$ , \*  $p < 0.1$ . Robust standard errors clustered by airport pair.

### OA.4.3. Connection to the Kidney Payback Policy

Prior to the implementation of the Kidney Allocation System (KAS) in 2014, a kidney payback policy existed such that the kidney sharing along the two opposite directions should be positively correlated. For each airport pair, we analyze the correlation of the number of shared kidneys across both directions and find a positive correlation (0.1776). Yet, the magnitude of the positive correlation is relatively small. A possible reason is that despite the kidney payback policy, the supply and the demand in the two opposite directions largely depend on the features of local donors and patients, and thus can be quite different.
